# Supplementary material for: Objective Measurement of Cosmetic Outcomes of Breast Conserving Therapy Using BCCT.core
Source: PubMed Central journal article supplement — Cancer Res Treat. 2015 Jun 22;48(2):491–8. doi: 10.4143/crt.2015.088 (PMC4843745; doi:10.4143/crt.2015.088), 2015-06-22
Supplement: crt-2015-088-supple.pdf [file crt-2015-088-supple.pdf]

# Objective Measurement of Cosmetic Outcomes of Breast Conserving Therapy Using BCCT.core

Tosol Yu, MD<sup>1</sup>, Keun-Yong Eom, MD, PhD<sup>1</sup>, Na Young Jang, MD, PhD<sup>1</sup>, Kyung Su Kim, MD<sup>1</sup>, Tae Ryool Koo, MD<sup>1</sup>, Jeanny Kwon, MD<sup>1</sup>, Byoung Hyuck Kim, MD<sup>1</sup>, Eunyoung Kang, MD, PhD<sup>2</sup>, Sung-Won Kim, MD, PhD<sup>2</sup>, Jae-Sung Kim, MD, PhD<sup>1</sup>, In Ah Kim, MD, PhD<sup>1</sup>

Departments of <sup>1</sup>Radiation Oncology and <sup>2</sup>Surgery, Seoul National University Bundang Hospital, Seongnam, Korea

## Supplementary Data

Supplementary Table 1. Cosmetic outcome by BCCT.core

|                        | Definition                       | Excellent or good (n=42) | Fair (n=9)       |
|------------------------|----------------------------------|--------------------------|------------------|
| BRA (cm)               | $\sqrt{(X_1-X_2)^2+(Y_1-Y_2)^2}$ | 1.8 (0-4.6)              | 3.2 (0.7-5.7)    |
| LBC (cm)               | $ (Y_1+NI_1)-(Y_2+NI_2) $        | 0.9 (0-2.7)              | 2.1 (0.2-3.9)    |
| UNR (cm)               | $ Y_1-Y_2 $                      | 1.5 (0-4.3)              | 2.3 (0.4-5.4)    |
| BCE (cm)               | $ NI_1-NI_2 $                    | 0.95 (0-3.5)             | 1.4 (0.1-3.6)    |
| BCD (cm)               | $ C_{right}-C_{left} $           | 1.75 (0.1-3.9)           | 3.3 (0.1-7.2)    |
| BAD (cm <sup>2</sup> ) | $ A_{right}-A_{left} $           | 15.0 (0-41.5)            | 22.3 (1.3-70.2)  |
| BOD (cm <sup>2</sup> ) | $ O_{right}-O_{left} $           | 30.8 (12-60.5)           | 44.6 (24.5-72.6) |

BRA, breast retraction assessment; LBC, lower breast contour; UNR, upward nipple retraction; BCE, breast compliance evaluation; BCD, breast contour difference; BAD, breast area difference; BOD, breast overlap difference; C, breast contour; A, breast area; O, breast overlapping area.
